# Supplementary material for: Plasmon-enhanced spectroscopy of absorption and spontaneous emissions explained using cavity quantum optics
Source: Royal Society of Chemistry journal article supplement (doi:10.1039/c7cs00155j), 2017-01-01
Supplement: c7cs00155j1.pdf [file c7cs00155j1.pdf]

1 **Derivation of Eq. (13)**

2  $\frac{\Delta\omega_{\text{cavR}}}{\Delta\omega_{\text{cavR}} + \Delta\omega_{\text{cavNR}}} F$  in Eq. (12) indicates that the radiative component in the Purcell

3 factor can contribute to EM enhancement. In the case of emission,  $\frac{\Delta\omega_{\text{cavR}}}{\Delta\omega_{\text{cavR}} + \Delta\omega_{\text{cavNR}}} F$

4 can enhance the radiative decay rate of spectral component of  $\omega_{\text{em}}$  as

5 
$$k_r(\omega_{\text{em}}) + k_r(\omega_{\text{em}})F_1(\omega_{\text{em}}) \frac{\Delta\omega_{\text{cavR}}}{\Delta\omega_{\text{cavR}} + \Delta\omega_{\text{cavNR}}}. \quad (\text{S1})$$

6 The enhanced total decay rate including higher order Purcell factors  $\sum_{l=1}^{\infty} F_l(\omega_{\text{em}})$  ( $F =$

7  $F_1$ , the Purcell factor of dipole mode) is

8 
$$K_r + K_{\text{nr}} + \int_0^{\infty} k_r(\omega_{\text{em}}) \sum_{l=1}^{\infty} F_l(\omega_{\text{em}}) d\omega_{\text{em}}, \quad (\text{S2})$$

9 where  $K_r (= \int_0^{\infty} k_r(\omega_{\text{em}}) d\omega_{\text{em}})$  and  $K_{\text{nr}} (= \int_0^{\infty} k_{\text{nr}}(\omega_{\text{em}}) d\omega_{\text{em}})$  are radiative and non-radiative

10 decay rate of a molecule in a free space, respectively, where

11  $k_r(\omega_{\text{em}})d\omega_{\text{em}}$  and  $k_{\text{nr}}(\omega_{\text{em}})d\omega_{\text{em}}$  are radiative and non-radiative decay rate at  $\omega_{\text{em}}$ ,

12 respectively. Thus, a radiative efficiency of molecule expressed as

13 
$$\frac{k_r(\omega_{\text{em}})}{K_r + K_{\text{nr}}} \quad (\text{S3})$$

14 is changed into

15 
$$\frac{k_r(\omega_{\text{em}}) + k_r(\omega_{\text{em}})F_1(\omega_{\text{em}}) \frac{\Delta\omega_{\text{cavR}}}{\Delta\omega_{\text{cavR}} + \Delta\omega_{\text{cavNR}}}}{K_r + K_{\text{nr}} + \int_0^{\infty} k_r(\omega_{\text{em}}) \sum_{l=1}^{\infty} F_l(\omega_{\text{em}}) d\omega_{\text{em}}}. \quad (\text{S4})$$

16 Thus, the enhancement factor of emission intensity is described as

$$\begin{aligned}
& \frac{k_r(\omega_{\text{em}}) + k_r(\omega_{\text{em}})F_l(\omega_{\text{em}}) \frac{\Delta\omega_{\text{cavR}}}{\Delta\omega_{\text{cavR}} + \Delta\omega_{\text{cavNR}}}}{K_r + K_{\text{nr}} + \int_0^\infty k_r(\omega_{\text{em}}) \sum_{l=1}^\infty F_l(\omega_{\text{em}}) d\omega_{\text{em}}} \\
17 \quad & \frac{\frac{k_r(\omega_{\text{em}})}{K_r + K_{\text{nr}}}}{1 + \frac{\int_0^\infty k_r(\omega_{\text{em}}) \sum_{l=1}^\infty F_l(\omega_{\text{em}}) d\omega_{\text{em}}}{K_r + K_{\text{nr}}}} = \frac{1 + F_l(\omega_{\text{em}}) \frac{\Delta\omega_{\text{cavR}}}{\Delta\omega_{\text{cavR}} + \Delta\omega_{\text{cavNR}}}}{1 + \frac{\int_0^\infty k_r(\omega_{\text{em}}) \sum_{l=1}^\infty F_l(\omega_{\text{em}}) d\omega_{\text{em}}}{K_r + K_{\text{nr}}}}. \quad (\text{S5})
\end{aligned}$$

18 In Eq. (S5), if one makes approximation as

$$19 \quad \int_0^\infty k_r(\omega_{\text{em}}) \sum_{l=1}^\infty F_l(\omega_{\text{em}}) d\omega_{\text{em}} \approx K_r \sum_{l=1}^\infty F_l(\omega_{\text{em}}). \quad (\text{S6})$$

20 One can derive the denominator of Eq. (13).
